# Supplementary material for: Case Report: Diffuse Cerebral Microbleeds in Cerebral Autosomal Recessive Arteriopathy With Subcortical Infarcts and Leukoencephalopathy
Source: PubMed Central journal article supplement (PMC8869253; doi:10.3389/fneur.2022.818332), 2022-02-09

# **Case Report: Massive Cerebral Microbleeds in Cerebral Autosomal Recessive Arteriopathy With Subcortical Infarcts and Leukoencephalopathy**

**Lan Wen<sup>1,2†</sup>, Jichao Yuan<sup>2†</sup>, Shuang Li<sup>3</sup>, Jieyi Zhao<sup>1</sup>, Congjun Li<sup>1</sup>, Jiafei Li<sup>1</sup>, Yuanyuan Han<sup>1</sup>, Chaohua Wang<sup>1\*</sup>, and Guangjian Li<sup>2\*</sup>**

<sup>1</sup>Department of Neurosurgery, West China Hospital, Sichuan University, Chengdu, China.

<sup>2</sup>Department of Neurology, Southwest Hospital, Third Military Medical University (Army Medical University), Chongqing, China.

<sup>3</sup>Department of Neurology, The Affiliated Hospital of Southwest Medical University, Luzhou, China.

† These authors have contributed equally to this work and share first authorship

**\* Correspondence:**

Guangjian Li

[lgjian991139@163.com](mailto:lgjian991139@163.com)

Chaohua Wang

[neuro\\_chaohua\\_wang@163.com](mailto:neuro_chaohua_wang@163.com)

**Figure 1S:** Gene sequencing. Targeted panel-sequencing revealed a novel homozygous missense mutation (c.508A > C, p.N170H) in HTRA1 of the patient, and her father had a heterozygous mutation at this site.

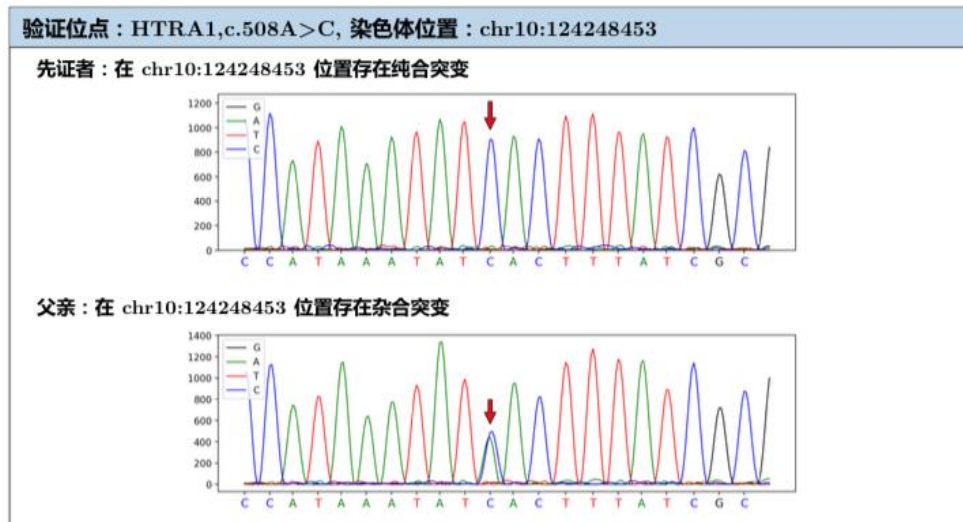

**Figure 2S:** This figure showed female pattern hair loss of the patient.

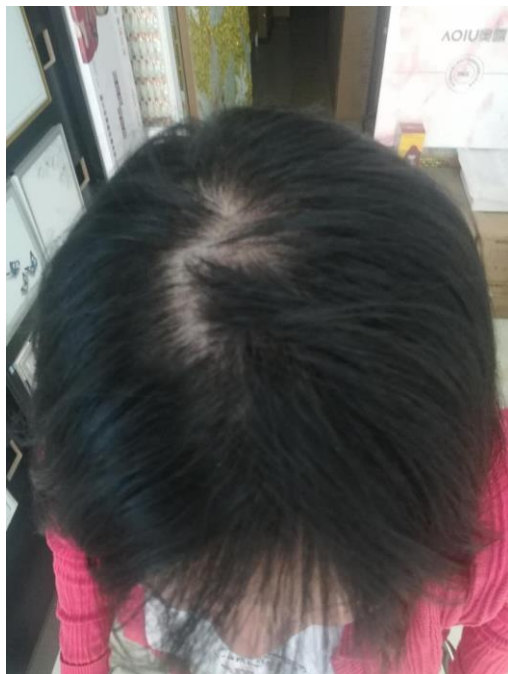

Supplement: Data_Sheet_1.pdf [file Data_Sheet_1.pdf]
